# Supplementary material
Source: PubMed Central journal article supplement (PMC3258036)
Supplement: supp_msr204_Demogines_Supplement.pdf [file supp_msr204_Demogines_Supplement.pdf]

**Table S1. Primate cell lines utilized and cell culture methods**

| Common Name           |                                 | Source  |         | Cell type    |
|-----------------------|---------------------------------|---------|---------|--------------|
| Gorilla               | <i>Gorilla gorilla</i>          | Coriell | PR00280 | Fibroblasts  |
| Borneo Orangutan      | <i>Pongo pygmaeus</i>           | Coriell | PR00650 | B-Lymphocyte |
| Bonobo                | <i>Pan paniscus</i>             | Coriell | PR00748 | B-Lymphocyte |
| White-handed Gibbon   | <i>Hylobates lar</i>            | Coriell | PR01131 | Fibroblasts  |
| Pileated Gibbon       | <i>Hylobates pileatus</i>       | Coriell | PR00243 | B-Lymphocyte |
| Yellow-Cheeked Gibbon | <i>Hylobates gabriellae</i>     | Coriell | PR00381 | B-Lymphocyte |
| Siamang               | <i>Hylobates syndactylus</i>    | Coriell | PR00722 | Fibroblasts  |
| White-Cheeked Gibbon  | <i>Hylobates leucogeny</i>      | Coriell | PR01037 | Fibroblasts  |
| Agile Gibbon          | <i>Hylobates agilis</i>         | Coriell | PR00773 | Fibroblasts  |
| Talapoin              | <i>Miopithecus talapoin</i>     | Coriell | PR00716 | Fibroblasts  |
| Colobus               | <i>Colobus guereza</i>          | Coriell | PR00980 | Fibroblasts  |
| Leaf Monkey           | <i>Trachypithecus francoisi</i> | Coriell | PR01099 | Fibroblasts  |
| Olive Baboon          | <i>Papio anubis</i>             | Coriell | PR00978 | Fibroblasts  |
| Black Mangabey        | <i>Lophocebus albigena</i>      | Coriell | PR01215 | Fibroblasts  |
| Wolf's Guenon         | <i>Cercopithecus wolffi</i>     | Coriell | PR01241 | Fibroblasts  |
| Squirrel Monkey       | <i>Saimiri sciureus</i>         | Coriell | PR00603 | Fibroblasts  |
| Titi Monkey           | <i>Callicebus cupreus</i>       | Coriell | PR00793 | Fibroblasts  |

METHODS: *DARC* was sequenced from these 17 primate species. Primary and immortalized primate cell lines (sources and individual primate identifiers are listed above) were grown in standard media supplemented with 15% fetal bovine serum at 37°C and in 5% CO<sub>2</sub>. Total DNA was harvested from cell lines using the AllPrep DNA/RNA kit (Qiagen). PCR was performed from total genomic DNA with PCR SuperMix High Fidelity (Invitrogen) using the primers shown in Table S2.

**Table S2. DARC PCR and sequencing primers**

This table lists PCR and sequencing primers used to amplify and sequence the *DARC* gene from genomic DNA

(PCR primers), \*sequencing primer

All samples were sequenced directly from pooled PCR products

|                       |                                                                       |
|-----------------------|-----------------------------------------------------------------------|
| Agile Gibbon          | (AD469/AD470) AD473*, AD474*<br>(KAT031/AD502) KAT035R*               |
| Black Mangabey        | (AD469/AD470) AD473*, AD474*<br>(KAT031*/AD502) KAT035R*              |
| Bonobo                | (AD469/AD470) AD473*, AD474*<br>(AD499/KAT038R*)                      |
| Borneo Orangutan      | (AD469/AD470) AD473*, AD474*<br>(KAT031*/ KAT038R*)                   |
| Colobus               | (AD469/AD470) AD473*, AD474*<br>(KAT031*/KAT035R*)                    |
| Gorilla               | (AD469/AD470) AD473*, AD474*<br>(KAT031*/KAT038R*), KAT032*, KAT038R* |
| Leaf Monkey           | (AD469/AD470) AD473*, AD474*<br>(KAT031*/KAT035R)                     |
| Olive Baboon          | (AD469/AD470) AD473*, AD474*<br>(KAT031/KAT035R*) KAT032*, KAT038R*   |
| Pileated Gibbon       | (AD469/AD470) AD473*, AD474*<br>(KAT031*/KAT038R*)                    |
| Siamang               | (AD469/AD470) AD473*, AD474*<br>(KAT031*/KAT035R*) KAT038R*           |
| Squirrel Monkey       | (AD469/AD470*) AD473*, AD474*<br>(KAT031*/ AD502*) KAT035*            |
| Talapoin              | (AD469/AD470) AD473*, AD474*<br>(KAT031*/KAT035R*) AD500*             |
| Titi Monkey           | (AD469/AD470) AD473*, AD474*<br>(KAT031*/AD501*) AD500*, KAT035R*     |
| White-cheeked Gibbon  | (AD469/AD470) AD473*, AD474*<br>(KAT031*/KAT038R*)                    |
| White-handed Gibbon   | (AD469/AD470) AD473*, AD474*<br>(KAT031*/KAT038R*)                    |
| Wolfs Guenon          | (AD469/AD470) AD473*, AD474*<br>(KAT031*/KAT035R*) KAT038R*           |
| Yellow-cheeked Gibbon | (AD469/AD470) AD473*, AD474*<br>(AD499*/KAT038R*)                     |

### Primers used for amplification and sequencing of *DARC*

| Primer Name | Sequence                   |
|-------------|----------------------------|
| AD469       | CAGACAAAATAAGAAACCACCCGC   |
| AD470       | CTGTCCTCCCCTCCCACC         |
| AD473       | GGGCTACTGTGTCTGGTATGG      |
| AD474       | CCTTGGCTCCAAACAAACCC       |
| AD499       | CGGTAAAATGCCCACTTTCTGGTCCC |
| AD500       | CAAATCCAACCTCAAACAGG       |
| AD501       | CCATACCAGACACAGTAGCCC      |
| AD502       | GAGGCATGGCACCCCTAGCAGC     |
| KAT031      | CTTCGGTAAAATGCCCACTTTCTGG  |
| KAT032      | GGTAAAATGCCCACTTTCTGGTCC   |
| KAT035 R    | GGAAGTGAAGTCAAAGGCAAAGG    |
| KAT038 R    | GGGAGAAAAGATGAGGAGGAAAAGG  |

Table S3. PAML methods and results, NSsites models, 35 species.

| DARC dataset <sup>a</sup> | $\omega_0$ <sup>c</sup> | codon freq. <sup>d</sup> | <i>M1a-M2a</i> <sup>b</sup> |         | <i>M7-M8</i> <sup>b</sup>   |         | <i>M8a-M8</i> <sup>b</sup>  |         | tree length <sup>f</sup> | dN/dS (%) <sup>g</sup> | AA Positions of dN/dS>1 <sup>h</sup> |                   |
|---------------------------|-------------------------|--------------------------|-----------------------------|---------|-----------------------------|---------|-----------------------------|---------|--------------------------|------------------------|--------------------------------------|-------------------|
|                           |                         |                          | 2 $\Delta\ell$ <sup>e</sup> | p-value | 2 $\Delta\ell$ <sup>e</sup> | p-value | 2 $\Delta\ell$ <sup>e</sup> | p-value |                          |                        | * p>0.95<br>NEB                      | ** p>0.99<br>BEB  |
| 35 primate dataset        | 0.4                     | f61                      | 8.9                         | p=0.012 | 9.2                         | p=0.010 | 8.6                         | p=0.003 | 1.18                     | 3.65 (4.2%)            | 31G*                                 | 7R, 31G*,<br>68T* |
|                           | 0.4                     | f3x4                     | 7.0                         | p=0.030 | 9.4                         | p=0.009 | 7.0                         | p=0.008 | 1.16                     | 3.70 (2.5%)            | 31G*                                 | 7R, 31G*,<br>68T  |
|                           | 1.6                     | f61                      | 8.9                         | p=0.012 | 9.2                         | p=0.010 | 8.6                         | p=0.003 | 1.18                     | 3.65 (4.2%)            | 31G*                                 | 7R, 31G*,<br>68T* |
|                           | 1.6                     | f3x4                     | 7.0                         | p=0.030 | 9.4                         | p=0.009 | 7.0                         | p=0.008 | 1.16                     | 3.70 (2.5%)            | 31G*                                 | 7R, 31G*,<br>68T  |

<sup>a</sup> Dataset consisted of the aligned DARC sequences from *Homo sapiens*, *Pan troglodytes*, *Pan paniscus*, *Gorilla gorilla*, *Pongo pygmaeus* (Sumatran Orangutan), *Pongo pygmaeus* (Borneo Orangutan), *Hylobates lar*, *Hylobates pileatus*, *Hylobates syndactylus*, *Hylobates leucogenys*, *Hylobates agilis*, *Hylobates gabriellae*, *Macaca mulatta*, *Lophocebus albigena*, *Papio anubis*, *Miopithecus talapoin*, *Cercopithecus wolfi*, *Colobus guereza*, *Trachypithecus francoisi*, *Theropithecus gelada*, *Mandrillus sphinx*, *Cercocebus agilis*, *Allenopithecus nigroviridis*, *Cercopithecus mona*, *Saimiri sciureus*, *Callithrix jacchus*, *Saguinus midas*, *Pithecia pithecia*, *Chiropotes satanas*, *Ateles geoffroyi*, *Saguinus imperator*, *Aotus trivirgatus*, *Saimiri boliviensis*, *Cebus apella* and *Callicebus cupreus*.

<sup>b</sup> Maximum likelihood analysis was performed with codeml in the PAML 4.1 software package (Yang Z. 1997. Comput. Appl. Biosci. 13: 555–556). To detect selection, multiple alignments were fitted to the NSsites models M1a (null model, codon values of dN/dS are fit into two site classes, one with value between 0 and 1, and one fixed at dN/dS=1), M2a (positive selection model, similar to M1a but with an extra class of dN/dS > 1 allowed), M7 (null model, codon values of dN/dS fit to a beta distribution, dN/dS > 1 disallowed), M8a (null model, similar to M7 except with a fixed codon class of at dN/dS = 1) and M8 (positive selection model, similar to M7 but with an extra class of dN/dS >1 allowed). All three comparisons are between a null model and a model of positive selection. The p-value reflects the confidence with which the null model can be rejected.

<sup>c</sup> Initial seed value for  $\omega$  (dN/dS) used in the maximum likelihood simulation

<sup>d</sup> Model of codon frequency

<sup>e</sup> Twice the difference in the natural logs of the likelihoods ( $\Delta\ell \times 2$ ) of the two models being compared. This value is used in a likelihood ratio test along with the degrees of freedom. In all cases (M1a-M2a), (M7-M8), (M8a-M8), a model that allows positive selection is compared to a null model. The p-value indicates the confidence with which the null model can be rejected.

<sup>f</sup> The tree length is the number of substitutions per site along all branches in the phylogeny. It is calculated as the sum of the branch lengths, and is a representation of total diversity in the dataset

<sup>g</sup> dN/dS value of the class of codons evolving under positive selection in M8, and the percent of codons falling in that class.

<sup>h</sup> Amino acid positions identified in the class of codons evolving under positive selection in M8 with a posterior probability >0.90. Coordinates correspond to the human protein.

Table S4. Datamonkey methods and results, 35 species.

| DARC dataset <sup>a</sup> | SLAC <sup>b</sup> | FEL <sup>b</sup> | REL <sup>b</sup> |
|---------------------------|-------------------|------------------|------------------|
| 35 primate dataset        | 68T               | 25V*,<br>68T*    | 31G,<br>68T*     |

<sup>a</sup> Dataset consisted of the aligned *DARC* sequences from *Homo sapiens*, *Pan troglodytes*, *Pan paniscus*, *Gorilla gorilla*, *Pongo pygmaeus* (Sumatran Orangutan), *Pongo pygmaeus* (Borneo Orangutan), *Hylobates lar*, *Hylobates pileatus*, *Hylobates syndactylus*, *Hylobates leucogenys*, *Hylobates agilis*, *Hylobates gabriellae*, *Macaca mulatta*, *Lophocebus albigena*, *Papio anubis*, *Miopithecus talapoin*, *Cercopithecus wolffi*, *Colobus guereza*, *Trachypithecus francoisi*, *Theropithecus gelada*, *Mandrillus sphinx*, *Cercocebus agilis*, *Allenopithecus nigroviridis*, *Cercopithecus mona*, *Saimiri sciureus*, *Callithrix jacchus*, *Saguinus midas*, *Pithecia pithecia*, *Chiropotes satanas*, *Ateles geoffroyi*, *Saguinus imperator*, *Aotus trivirgatus*, *Saimiri boliviensis*, *Cebus apella* and *Callicebus cupreus*.

<sup>b</sup> Positive selection analysis was performed using Datamonkey (Delport W et.al. 2010. *Bioinformatics* 26: 2455–2457), a web-based implementation of the HyPhy software package, using the single likelihood ancestor counting (SLAC), fixed effects likelihood (FEL), and random effects likelihood (REL) tests. SLAC tests for positive selection using a modified version of the Suzuki–Gojobori counting approach. The FEL test uses a likelihood-based approach, in which dS and dN are evaluated at each site based on a codon-substitution model. The REL test for positive selection is a variant of the likelihood methods used in PAML (Yang Z. 1997. *Comput. Appl. Biosci.* 13: 555–556). Codon positions identified as evolving under positive selection with a p-value <0.10 (\*<0.05) are listed for the SLAC and FEL analyses, and sites with a posterior probability >0.90 (\* >0.95) are listed for the REL analysis. Coordinates correspond to the human protein.

Table S5. PAML methods and results, NSsites models, hominoid species only.

| DARC dataset <sup>a</sup> | $\omega_0$ <sup>c</sup> | codon freq. <sup>d</sup> | <i>M1a-M2a</i> <sup>b</sup> |         | <i>M7-M8</i> <sup>b</sup>   |         | <i>M8a-M8</i> <sup>b</sup>  |         | tree length <sup>f</sup> | dN/dS (%) <sup>g</sup> | AA Positions of dN/dS > 1 <sup>h</sup> |                          |
|---------------------------|-------------------------|--------------------------|-----------------------------|---------|-----------------------------|---------|-----------------------------|---------|--------------------------|------------------------|----------------------------------------|--------------------------|
|                           |                         |                          | 2 $\Delta\ell$ <sup>e</sup> | p-value | 2 $\Delta\ell$ <sup>e</sup> | p-value | 2 $\Delta\ell$ <sup>e</sup> | p-value |                          |                        | * p>0.95<br>NEB                        | ** p>0.99<br>BEB         |
| 13 primate dataset        | 0.4                     | f61                      | 11.9                        | p=0.003 | 13.1                        | p=0.001 | 11.8                        | p<0.001 | 0.36                     | 10.0 (2.7%)            | R7**,<br>25V,<br>197L                  | R7**,<br>25V*,<br>197L*  |
|                           | 0.4                     | f3x4                     | 18.9                        | p<0.001 | 19.0                        | p<0.001 | 18.9                        | p<0.001 | 0.40                     | 28.0 (0.9%)            | R7**,<br>25V,<br>197L*                 | R7**,<br>25V*,<br>197L** |
|                           | 1.6                     | f61                      | 11.9                        | p=0.003 | 11.9                        | p=0.003 | 11.8                        | p<0.001 | 0.36                     | 10.0 (2.7%)            | R7**,<br>25V,<br>197L                  | R7**,<br>25V*,<br>197L*  |
|                           | 1.6                     | f3x4                     | 18.9                        | p<0.001 | 19.0                        | p<0.001 | 18.9                        | p<0.001 | 0.40                     | 28.0 (0.9%)            | R7**,<br>25V,<br>197L*                 | R7**,<br>25V*,<br>197L** |

<sup>a</sup> Dataset consisted of the aligned DARC sequences from *Homo sapiens*, *Pan troglodytes*, *Pan paniscus*, *Gorilla gorilla*, *Pongo pygmaeus* (Sumatran Orangutan), *Pongo pygmaeus* (Borneo Orangutan), *Hylobates lar*, *Hylobates pileatus*, *Hylobates syndactylus*, *Hylobates leucogenys*, *Hylobates agilis*, *Hylobates gabriellae*, and *Macaca mulatta* (as an outgroup).

<sup>b</sup> Maximum likelihood analysis was performed with codeml in the PAML 4.1 software package (Yang Z. 1997. Comput. Appl. Biosci. 13: 555–556). To detect selection, multiple alignments were fitted to the NSsites models M1a (null model, codon values of dN/dS are fit into two site classes, one with value between 0 and 1, and one fixed at dN/dS=1), M2a (positive selection model, similar to M1a but with an extra class of dN/dS > 1 allowed), M7 (null model, codon values of dN/dS fit to a beta distribution, dN/dS > 1 disallowed), M8a (null model, similar to M7 except with a fixed codon class of at dN/dS = 1) and M8 (positive selection model, similar to M7 but with an extra class of dN/dS > 1 allowed). All three comparisons are between a null model and a model of positive selection. The p-value reflects the confidence with which the null model can be rejected.

<sup>c</sup> Initial seed value for  $\omega$  (dN/dS) used in the maximum likelihood simulation

<sup>d</sup> Model of codon frequency

<sup>e</sup> Twice the difference in the natural logs of the likelihoods ( $\Delta\ell \times 2$ ) of the two models being compared. This value is used in a likelihood ratio test along with the degrees of freedom. In all cases (M1a-M2a), (M7-M8), (M8a-M8), a model that allows positive selection is compared to a null model. The p-value indicates the confidence with which the null model can be rejected.

<sup>f</sup> The tree length is the number of substitutions per site along all branches in the phylogeny. It is calculated as the sum of the branch lengths, and is a representation of total diversity in the dataset

<sup>g</sup> dN/dS value of the class of codons evolving under positive selection in M8, and the percent of codons falling in that class.

<sup>h</sup> Amino acid positions identified in the class of codons evolving under positive selection in M8 with a posterior probability >0.90. Coordinates correspond to the human protein.

Table S6. Branch-site test for positive selection in the hominoid clade

| branch-site model <sup>a</sup>         | estimate of parameters <sup>b</sup> |                        |                        | Test 2                                  |         | AA Positions of dN/dS>1 <sup>d</sup> |                           |
|----------------------------------------|-------------------------------------|------------------------|------------------------|-----------------------------------------|---------|--------------------------------------|---------------------------|
|                                        |                                     |                        |                        | 2Δℓ <sup>c</sup>                        | p-value |                                      |                           |
| Model A with ω <sub>2</sub> fixed at 1 | ℓ = -3625.75                        | p <sub>0</sub> = 0.321 | p <sub>1</sub> = 0.298 | p <sub>2a</sub> +p <sub>2b</sub> = 0.38 | 16.2    | p < 0.001                            | 7R**,<br>25V**,<br>197L** |
| Model A                                | ℓ = -3617.65                        | p <sub>0</sub> = 0.520 | p <sub>1</sub> = 0.437 | p <sub>2a</sub> +p <sub>2b</sub> = 0.04 |         |                                      |                           |
|                                        |                                     | ω <sub>0</sub> = 0.017 | ω <sub>1</sub> = 1.000 | ω <sub>2</sub> = 1.000                  |         |                                      |                           |
|                                        |                                     | ω <sub>0</sub> = 0.082 | ω <sub>1</sub> = 1.000 | ω <sub>2</sub> = 11.3                   |         |                                      |                           |

<sup>a</sup> Dataset consisted of the aligned DARC sequences from *Homo sapiens*, *Pan troglodytes*, *Pan paniscus*, *Gorilla gorilla*, *Pongo pygmaeus* (Sumatran Orangutan), *Pongo pygmaeus* (Borneo Orangutan), *Hylobates lar*, *Hylobates pileatus*, *Hylobates syndactylus*, *Hylobates leucogenys*, *Hylobates agilis*, *Hylobates gabriellae*, *Macaca mulatta*, *Lophocebus albigena*, *Papio anubis*, *Miopithecus talapoin*, *Cercopithecus wolffi*, *Colobus guereza*, *Trachypithecus francoisi*, *Theropithecus gelada*, *Mandrillus sphinx*, *Cercocebus agilis*, *Allenopithecus nigroviridis*, *Cercopithecus mona*, *Saimiri sciureus*, *Callithrix jacchus*, *Saguinus midas*, *Pithecia pithecia*, *Chiropotes satanas*, *Ateles geoffroyi*, *Saguinus imperator*, *Aotus trivirgatus*, *Saimiri boliviensis*, *Cebus apella* and *Callicebus cupreus*. The hominoid clade (the first 12 primates listed) were defined as the foreground clade in the models.

<sup>b</sup> To implement the branch-sites test (Zhang J, Nielsen R, and Yang Z. 2005. Mol Biol Evol 22: 2472–2479), multiple alignments were fitted to the branch-sites Model A (positive selection model, codon values of dN/dS along background branches are fit into two site classes, one (ω<sub>0</sub>) between 0 and 1 and one (ω<sub>1</sub>) equal to 1, on the foreground branches a third site class is allowed (ω<sub>2</sub>) with dN/dS > 1), and Model A with fixed ω<sub>2</sub> = 1 (null model, similar to Model A except the foreground ω<sub>2</sub> value is fixed at 1). The branch-sites model for positive selection (Model A) allows certain codons to evolve with dN/dS > 1 exclusively along the lineages of the foreground clade. p<sub>2a</sub> + p<sub>2b</sub> is the sum of the proportion of sites that fall into the categories of background-branch < 1/foreground branch > 1 (p<sub>2a</sub>) and background branch = 1/foreground branch > 1 (p<sub>2b</sub>). Models were run using the f61 codon model and an initial seed value of ω=1.5.

<sup>c</sup> A likelihood ratio test (branch-site test 2) was performed to assess whether permitting codons to evolve under positive selection in the hominoid clade (Model A) gives a significantly better fit to the data than disallowing this (null model; Model A with ω<sub>2</sub> fixed at 1). Twice the difference in the natural logs of the likelihoods (Δℓ × 2) of the two models being compared is shown. This value is used in a likelihood ratio test along with the degrees of freedom (1 in this case). The p-value indicates the confidence with which the null model can be rejected.

<sup>d</sup> Residue positions identified in the class of codons evolving under positive selection with a posterior probability > 0.90 (\* p>0.95 and \*\* p>0.99). Coordinates correspond to the human protein.
